# Supplementary material for: Long-term and realistic global change manipulations had low impact on diversity of soil biota in temperate heathland
Source: PubMed Central journal article supplement (PMC5264592; doi:10.1038/srep41388), 2017-01-25
Supplement: srep41388-s1.pdf [file srep41388-s1.pdf]

**Supplementary Information for**

**”Long-term and realistic global change manipulations had low impact on diversity of soil biota in temperate heathland”**

authored by:

Martin Holmstrup<sup>1,2\*</sup>, Christian Damgaard<sup>1</sup>, Inger K. Schmidt<sup>3</sup>, Marie F. Arndal<sup>3</sup>, Claus Beier<sup>3</sup>, Teis N. Mikkelsen<sup>4</sup>, Per Ambus<sup>5</sup>, Klaus S. Larsen<sup>3</sup>, Kim Pilegaard<sup>4</sup>, Anders Michelsen<sup>6</sup>, Louise C. Andresen<sup>7</sup>, Merian Haugwitz<sup>6,8</sup>, Lasse Bergmark<sup>8</sup>, Anders Priemé<sup>8</sup>, Andrey S. Zaitsev<sup>9,10</sup>, Slavka Georgieva<sup>6,11</sup>, Marie Dam<sup>6</sup>, Mette Vestergård<sup>6</sup>, Søren Christensen<sup>6</sup>

<sup>1</sup> Department of Bioscience, Aarhus University, Vejlshøjvej 25, 8600 Silkeborg, Denmark

<sup>2</sup> Aarhus Institute of Advanced Studies, Aarhus University, Høegh-Guldbergs Gade 6B  
8000 Aarhus C, Denmark

<sup>3</sup> Section for Forest, Nature and Biomass, Department of Geosciences and Natural Resource Management, University of Copenhagen, Rolighedsvej 23, 1958 Frederiksberg, Denmark

<sup>4</sup> Department of Environmental Engineering, Atmospheric Environment, Technical University of Denmark, 2800 Kgs. Lyngby, Denmark

<sup>5</sup> Section for Geography, Department of Geosciences and Natural Resource Management, University of Copenhagen, Øster Voldgade 10, 1350 Copenhagen, DK

<sup>6</sup> Terrestrial Ecology Section, Department of Biology, University of Copenhagen, Universitetsparken 15, 2100 Copenhagen Ø, Denmark

<sup>7</sup> Department of Earth Sciences, University of Gothenburg, P.O. Box 460, 405 30 Gothenburg, Sweden

<sup>8</sup> Section of Microbiology, Department of Biology, University of Copenhagen, Universitetsparken 15, 2100 Copenhagen Ø, Denmark.

<sup>9</sup> Institute of Animal Ecology, Justus-Liebig-University, Heinrich-Buff Ring 26-32 (IFZ), 35392 Giessen, Germany

<sup>10</sup> A.N. Severtsov Institute of Ecology and Evolution, Russian Academy of Sciences, Leninsky prospekt, 33, Moscow 119071, Russian Federation

<sup>11</sup> Department of Zoology and Anthropology, Faculty of Biology, Sofia University, Dragan Tzankov 8, 1164 Sofia, Bulgaria

\* Corresponding author: Martin Holmstrup; email: [martin.holmstrup@bios.au.dk](mailto:martin.holmstrup@bios.au.dk)  
phone: +45 3018 3152

Table S1. Mean abundance of nematodes ( $m^{-2}$ ) belonging to different feeding groups and the Shannon index of functional diversity (nematodes classified by feeding groups) in ambient (A; control), warmed (T), drought (D) and CO<sub>2</sub> treated plots (CO<sub>2</sub>) at the CLIMAITÉ field site.

|                             | A      |       | T      |        | D     |       | TD     |       | CO <sub>2</sub> |        | TCO <sub>2</sub> |       | DCO <sub>2</sub> |        | TDCO <sub>2</sub> |       |
|-----------------------------|--------|-------|--------|--------|-------|-------|--------|-------|-----------------|--------|------------------|-------|------------------|--------|-------------------|-------|
|                             | mean   | SD    | mean   | SD     | mean  | SD    | mean   | SD    | mean            | SD     | mean             | SD    | mean             | SD     | mean              | SD    |
| 2007                        |        |       |        |        |       |       |        |       |                 |        |                  |       |                  |        |                   |       |
| Bacterial feeders           | 103505 | 52331 | 135420 | 111593 | 85233 | 42768 | 113100 | 60660 | 148115          | 91946  | 81137            | 32435 | 125826           | 103816 | 100693            | 36779 |
| Fungal feeders              | 6587   | 3920  | 3317   | 3638   | 3794  | 4533  | 8448   | 8010  | 2789            | 2475   | 6654             | 4866  | 5577             | 8395   | 6514              | 4470  |
| Plant parasitic             | 44211  | 23959 | 42275  | 39339  | 36929 | 25310 | 38209  | 17486 | 69110           | 63100  | 49804            | 28636 | 71865            | 93864  | 40564             | 30414 |
| Omnivorous                  | 4625   | 4238  | 6428   | 7282   | 7119  | 3958  | 6012   | 3508  | 12705           | 4445   | 12372            | 4476  | 11259            | 3798   | 9283              | 6289  |
| Predacious                  | 0      | 0     | 1360   | 3331   | 463   | 827   | 1097   | 1800  | 1013            | 1295   | 3221             | 5011  | 177              | 433    | 1473              | 3608  |
| Shannon index of diversity* | 0.82   | 0.21  | 0.71   | 0.29   | 0.89  | 0.11  | 0.87   | 0.12  | 0.85            | 0.18   | 1.03             | 0.18  | 0.93             | 0.14   | 0.86              | 0.26  |
| 2013                        |        |       |        |        |       |       |        |       |                 |        |                  |       |                  |        |                   |       |
| Bacterial feeders           | 85931  | 53409 | 52093  | 26456  | 85709 | 58830 | 74902  | 81811 | 69849           | 50369  | 43072            | 46107 | 75140            | 61313  | 105208            | 61487 |
| Fungal feeders              | 24993  | 24121 | 23710  | 25868  | 19556 | 9862  | 32357  | 51361 | 103955          | 111658 | 21329            | 19090 | 81898            | 100422 | 31450             | 12523 |
| Plant parasitic             | 95939  | 54474 | 91415  | 72014  | 58456 | 36454 | 61095  | 41061 | 106725          | 107172 | 56092            | 32302 | 73256            | 67750  | 111261            | 75492 |
| Omnivorous                  | 1631   | 1710  | 4832   | 5145   | 1823  | 1697  | 4311   | 4216  | 6009            | 3155   | 2037             | 3814  | 5022             | 7104   | 4715              | 4853  |
| Predacious                  | 0      | 0     | 128    | 219    | 0     | 0     | 274    | 546   | 470             | 907    | 0                | 0     | 41               | 100    | 74                | 117   |
| Shannon index of diversity* | 0.91   | 0.15  | 0.99   | 0.14   | 0.96  | 0.14  | 0.91   | 0.18  | 1.13            | 0.08   | 0.99             | 0.11  | 0.97             | 0.18   | 1.03              | 0.04  |
| * based on feeding groups   |        |       |        |        |       |       |        |       |                 |        |                  |       |                  |        |                   |       |

Table S2. Mean abundance of enchytraeids ( $m^{-2}$ ) in April 2013, the Shannon index of diversity and species richness in ambient (A; control), warmed (T), drought (D) and CO<sub>2</sub> treated plots (CO<sub>2</sub>) at the CLIMAITE field site. Data from Holmstrup et al. (2015).

|                                   | A       |       | T      |        | D      |       | TD     |       | CO <sub>2</sub> |       | TCO <sub>2</sub> |       | DCO <sub>2</sub> |         | TDCO <sub>2</sub> |        |
|-----------------------------------|---------|-------|--------|--------|--------|-------|--------|-------|-----------------|-------|------------------|-------|------------------|---------|-------------------|--------|
|                                   | mean    | SD    | mean   | SD     | mean   | SD    | mean   | SD    | mean            | SD    | mean             | SD    | mean             | SD      | mean              | SD     |
| <i>Achaeta aberrans</i>           | 70      | 172   | 0      | 0      | 0      | 0     | 1053   | 1298  | 0               | 0     | 0                | 0     | 70               | 172     | 0                 | 0      |
| <i>Achaeta abulba</i>             | 0       | 0     | 0      | 0      | 0      | 0     | 0      | 0     | 632             | 1547  | 351              | 860   | 1263             | 3094    | 2386              | 5845   |
| <i>Achaeta affinis</i>            | 4351    | 5772  | 50041  | 116656 | 3018   | 4647  | 912    | 2036  | 983             | 1426  | 2035             | 2546  | 4492             | 9777    | 7439              | 12747  |
| <i>achaeta sp</i>                 | 140     | 344   | 0      | 0      | 0      | 0     | 1895   | 4439  | 0               | 0     | 0                | 0     | 0                | 0       | 1263              | 3094   |
| <i>Chamaedrillus chlorophilus</i> | 20283   | 17853 | 30249  | 21151  | 21125  | 10790 | 24915  | 26717 | 18599           | 14762 | 25266            | 20514 | 24143            | 11826   | 18318             | 12584  |
| <i>Enchytronia parva</i>          | 281     | 344   | 351    | 414    | 70     | 172   | 491    | 817   | 140             | 217   | 1263             | 1975  | 211              | 516     | 1614              | 2994   |
| <i>Enchytraeus norvegicus</i>     | 0       | 0     | 0      | 0      | 0      | 0     | 281    | 510   | 0               | 0     | 140              | 344   | 0                | 0       | 0                 | 0      |
| <i>Fridericia cylindrica</i>      | 0       | 0     | 0      | 0      | 0      | 0     | 0      | 0     | 0               | 0     | 0                | 0     | 0                | 0       | 281               | 688    |
| <i>Fridericia striata</i>         | 0       | 0     | 0      | 0      | 0      | 0     | 0      | 0     | 0               | 0     | 0                | 0     | 0                | 0       | 0                 | 0      |
| <i>Marionina clavata</i>          | 2386    | 5845  | 0      | 0      | 0      | 0     | 70     | 172   | 0               | 0     | 0                | 0     | 0                | 0       | 0                 | 0      |
| <i>Oconnorella cambrensis</i>     | 4281    | 9674  | 1333   | 3266   | 3299   | 6248  | 4492   | 7494  | 1404            | 2317  | 2597             | 5764  | 2246             | 1740    | 1263              | 2498   |
| <i>Fridericia ratzeli</i>         | 0       | 0     | 0      | 0      | 0      | 0     | 0      | 0     | 0               | 0     | 0                | 0     | 0                | 0       | 70                | 172    |
| Shannon index                     | 0.63818 | 0.383 | 0.3343 | 0.3311 | 0.4355 | 0.421 | 0.6927 | 0.361 | 0.3409          | 0.341 | 0.463            | 0.309 | 0.564            | 0.21248 | 0.72316           | 0.3087 |
| Species richness                  | 3.33    | 0.82  | 2.33   | 1.03   | 2.33   | 1.03  | 3.83   | 1.60  | 2.33            | 1.37  | 2.83             | 1.17  | 3.00             | 0.63    | 3.50              | 1.38   |

Table S3a. Mean abundance of collembolans ( $m^{-2}$ ) in October 2007, the Shannon index of diversity and species richness in ambient (A; control), warmed (T), drought (D) and CO<sub>2</sub> treated plots (CO2) at the CLIMAITE field site.

|                                 | A     |       | T     |       | D     |       | TD   |       | CO2   |       | TCO2  |       | DCO2  |       | TDCO2 |       |
|---------------------------------|-------|-------|-------|-------|-------|-------|------|-------|-------|-------|-------|-------|-------|-------|-------|-------|
|                                 | mean  | SD    | mean  | SD    | mean  | SD    | mean | SD    | mean  | SD    | mean  | SD    | mean  | SD    | mean  | SD    |
| <i>Brachystomella parvula</i>   | 59    | 144   | 808   | 998   | 883   | 1994  | 1242 | 1437  | 353   | 547   | 375   | 758   | 379   | 758   | 0     | 0     |
| <i>Cyphoderus albinus</i>       | 294   | 721   | 0     | 0     | 177   | 432   | 610  | 1494  | 0     | 0     | 4321  | 8911  | 2936  | 4409  | 588   | 825   |
| <i>Desoria tigrina</i>          | 0     | 0     | 0     | 0     | 0     | 0     | 0    | 0     | 0     | 0     | 0     | 0     | 0     | 0     | 294   | 721   |
| <i>Entomobrya sp.</i>           | 118   | 182   | 0     | 0     | 118   | 182   | 0    | 0     | 235   | 365   | 0     | 0     | 379   | 758   | 316   | 774   |
| <i>Folsomia fimetaria</i>       | 353   | 865   | 0     | 0     | 0     | 0     | 0    | 0     | 118   | 288   | 0     | 0     | 0     | 0     | 59    | 144   |
| <i>Folsomia quadrioculata</i>   | 883   | 1667  | 948   | 1586  | 2704  | 6111  | 3565 | 5419  | 1103  | 1553  | 4637  | 5318  | 2275  | 4549  | 2013  | 3100  |
| <i>Heteromurus nitidus</i>      | 0     | 0     | 0     | 0     | 0     | 0     | 353  | 865   | 0     | 0     | 0     | 0     | 0     | 0     | 0     | 0     |
| <i>Isotoma sp.</i>              | 1536  | 2232  | 948   | 1586  | 1440  | 2185  | 2109 | 3695  | 765   | 1366  | 632   | 979   | 2654  | 3715  | 0     | 0     |
| <i>isotomiella minor</i>        | 1294  | 2685  | 59    | 144   | 59    | 144   | 5798 | 8583  | 412   | 1009  | 1954  | 3759  | 424   | 684   | 14886 | 35436 |
| <i>Isotomurus sp.</i>           | 0     | 0     | 0     | 0     | 632   | 1548  | 316  | 774   | 0     | 0     | 0     | 0     | 0     | 0     | 0     | 0     |
| <i>Lepidocyrtus lanuginosus</i> | 59    | 144   | 0     | 0     | 0     | 0     | 0    | 0     | 0     | 0     | 0     | 0     | 0     | 0     | 316   | 774   |
| <i>Megalothorax minimus</i>     | 10546 | 19161 | 5110  | 5221  | 5079  | 4288  | 4506 | 6844  | 2706  | 3632  | 4460  | 3499  | 1252  | 882   | 5166  | 3739  |
| <i>Mesaphorura sp.</i>          | 6376  | 4958  | 21037 | 28053 | 17554 | 15835 | 5175 | 6410  | 18527 | 32137 | 9143  | 6815  | 11403 | 14155 | 13352 | 8864  |
| <i>Micranurida pygmaea</i>      | 118   | 288   | 669   | 1032  | 867   | 1615  | 706  | 1023  | 412   | 266   | 1065  | 1693  | 1896  | 2937  | 551   | 744   |
| <i>Micranurophorus musci</i>    | 1059  | 2594  | 471   | 763   | 1589  | 2484  | 412  | 1009  | 1942  | 4756  | 3707  | 9079  | 0     | 0     | 1589  | 3891  |
| <i>Neanura muscorum</i>         | 316   | 774   | 316   | 774   | 59    | 144   | 59   | 144   | 235   | 428   | 0     | 0     | 141   | 173   | 0     | 0     |
| <i>Orchesella sp.</i>           | 375   | 758   | 316   | 774   | 316   | 774   | 0    | 0     | 118   | 288   | 0     | 0     | 0     | 0     | 316   | 774   |
| <i>Parisotoma notabilis</i>     | 6655  | 5101  | 2756  | 1770  | 4578  | 4832  | 8696 | 7734  | 4896  | 4417  | 12674 | 14387 | 10087 | 15029 | 13080 | 16064 |
| <i>Protaphorura sp.</i>         | 2360  | 2812  | 3432  | 2460  | 5783  | 6721  | 9862 | 15046 | 2279  | 1313  | 7325  | 7064  | 7274  | 6478  | 4953  | 5511  |
| <i>Sminthuridae spp.</i>        | 1669  | 664   | 59    | 144   | 1440  | 2185  | 728  | 898   | 706   | 1023  | 177   | 295   | 2107  | 2242  | 2013  | 1540  |
| <i>Sminthurides pumilis</i>     | 412   | 469   | 59    | 144   | 59    | 144   | 59   | 144   | 118   | 182   | 0     | 0     | 0     | 0     | 316   | 774   |
| <i>Tomocerus sp.</i>            | 375   | 758   | 0     | 0     | 0     | 0     | 59   | 144   | 0     | 0     | 0     | 0     | 0     | 0     | 375   | 758   |
| <i>Willemia sp.</i>             | 0     | 0     | 0     | 0     | 316   | 774   | 0    | 0     | 0     | 0     | 0     | 0     | 0     | 0     | 0     | 0     |
| Shannon index                   | 1.64  | 0.31  | 1.28  | 0.44  | 1.47  | 0.42  | 1.70 | 0.26  | 1.40  | 0.55  | 1.48  | 0.42  | 1.53  | 0.41  | 1.53  | 0.26  |
| Species richness                | 8.50  | 2.81  | 6.67  | 1.51  | 8.33  | 1.63  | 8.17 | 2.32  | 7.83  | 3.66  | 6.67  | 1.51  | 7.50  | 3.51  | 8.17  | 1.72  |

Table S3b. Mean abundance of collembolans ( $m^{-2}$ ) in April 2013, the Shannon index of diversity and species richness in ambient (A; control), warmed (T), drought (D) and CO<sub>2</sub> treated plots (CO2) at the CLIMAITE field site.

|                                   | A     |       | T     |       | D     |       | TD    |       | CO2   |       | TCO2   |       | DCO2  |        | TDCO2 |       |
|-----------------------------------|-------|-------|-------|-------|-------|-------|-------|-------|-------|-------|--------|-------|-------|--------|-------|-------|
|                                   | mean  | SD    | mean  | SD    | mean  | SD    | mean  | SD    | mean  | SD    | mean   | SD    | mean  | SD     | mean  | SD    |
| <i>Brachystomelle parvula</i>     | 633   | 980   | 316   | 775   | 316   | 775   | 1266  | 1961  | 316   | 775   | 949    | 2325  | 949   | 1040   | 949   | 1040  |
| <i>Cyphoderus albinus</i>         | 118   | 289   | 0     | 0     | 316   | 775   | 59    | 144   | 0     | 0     | 670    | 1040  | 412   | 649    | 0     | 0     |
| <i>Entomobryidae spp</i>          | 3164  | 6082  | 633   | 980   | 434   | 738   | 1898  | 1201  | 1957  | 3137  | 1898   | 3797  | 1582  | 2219   | 692   | 1528  |
| <i>Folsomia manolachei</i>        | 5379  | 9018  | 1008  | 1716  | 2847  | 2325  | 3480  | 5425  | 3164  | 2299  | 1898   | 3797  | 2847  | 1991   | 1266  | 1550  |
| <i>Isotoma viridis</i>            | 0     | 0     | 316   | 775   | 0     | 0     | 0     | 0     | 0     | 0     | 0      | 0     | 0     | 0      | 0     | 0     |
| <i>Isotomiella minor</i>          | 33338 | 33232 | 20248 | 19122 | 19535 | 19730 | 20168 | 19184 | 41542 | 52650 | 115259 | 69396 | 53072 | 104872 | 31499 | 21384 |
| <i>Lepidocyrtus violaceus</i>     | 0     | 0     | 0     | 0     | 0     | 0     | 0     | 0     | 0     | 0     | 0      | 0     | 0     | 0      | 0     | 0     |
| <i>Lepidocyrtus lignorum</i>      | 0     | 0     | 316   | 775   | 316   | 775   | 633   | 1550  | 633   | 980   | 633    | 980   | 1067  | 1681   | 59    | 144   |
| <i>Megalothorax minimus</i>       | 8440  | 6830  | 3856  | 3678  | 5872  | 7214  | 10500 | 14804 | 4172  | 4364  | 6799   | 3035  | 10500 | 12711  | 4606  | 3322  |
| <i>Micranurida pygmaea</i>        | 3539  | 2234  | 692   | 1528  | 1266  | 980   | 633   | 980   | 1501  | 655   | 1759   | 1537  | 1582  | 1429   | 4113  | 4398  |
| <i>Micranurophorus musci</i>      | 0     | 0     | 1237  | 3031  | 4772  | 11690 | 589   | 1443  | 0     | 0     | 295    | 722   | 177   | 296    | 766   | 1876  |
| <i>Neanura muscorum</i>           | 0     | 0     | 0     | 0     | 0     | 0     | 0     | 0     | 316   | 775   | 0      | 0     | 0     | 0      | 0     | 0     |
| <i>Onychiurinae spp</i>           | 2531  | 2299  | 1898  | 2941  | 4113  | 6400  | 4746  | 4611  | 1898  | 2401  | 633    | 980   | 5695  | 5233   | 4805  | 8862  |
| <i>Orchesella sp</i>              | 0     | 0     | 316   | 775   | 316   | 775   | 316   | 775   | 0     | 0     | 316    | 775   | 0     | 0      | 316   | 775   |
| <i>Parisetoma notabilis</i>       | 11390 | 16462 | 14870 | 19997 | 8226  | 9117  | 8918  | 9073  | 16768 | 16480 | 15186  | 11640 | 11625 | 7842   | 8542  | 4914  |
| <i>Pogonognathellus flavesens</i> | 1266  | 3100  | 633   | 980   | 1582  | 2523  | 2847  | 4287  | 0     | 0     | 633    | 980   | 949   | 1588   | 316   | 775   |
| <i>Sminthurides pumilis</i>       | 0     | 0     | 0     | 0     | 0     | 0     | 0     | 0     | 0     | 0     | 316    | 775   | 316   | 775    | 0     | 0     |
| <i>Symphyleona spp</i>            | 2016  | 1708  | 3458  | 4537  | 8344  | 6638  | 7395  | 4381  | 3856  | 2787  | 7137   | 5075  | 6821  | 7298   | 4408  | 5386  |
| <i>Tullbergiinae spp</i>          | 26026 | 10220 | 9330  | 8287  | 51381 | 52403 | 48996 | 58247 | 11169 | 8294  | 17270  | 8689  | 19454 | 16778  | 15003 | 11818 |
| <i>Willemia sp</i>                | 0     | 0     | 1898  | 4650  | 0     | 0     | 0     | 0     | 0     | 0     | 0      | 0     | 0     | 0      | 0     | 0     |
| Shannon index                     | 1.46  | 0.30  | 1.61  | 0.37  | 1.38  | 0.32  | 1.43  | 0.59  | 1.49  | 0.35  | 1.22   | 0.40  | 1.68  | 0.38   | 1.49  | 0.17  |
| Species richness                  | 7.67  | 1.03  | 7.50  | 1.87  | 8.67  | 1.86  | 8.00  | 1.67  | 8.00  | 1.79  | 8.33   | 2.07  | 9.33  | 1.75   | 7.67  | 1.75  |

Table S4a. Mean abundance of oribatids ( $m^{-2}$ ) in 2007, the Shannon index of diversity and species richness in ambient (A; control), warmed (T), drought (D) and CO<sub>2</sub> treated plots (CO<sub>2</sub>) at the CLIMAITE field site.

|                                        | A    |      | T    |      | D    |       | TD   |       | CO <sub>2</sub> |       | TCO <sub>2</sub> |      | DCO <sub>2</sub> |      | TDCO <sub>2</sub> |      |
|----------------------------------------|------|------|------|------|------|-------|------|-------|-----------------|-------|------------------|------|------------------|------|-------------------|------|
|                                        | mean | SD   | mean | SD   | mean | SD    | mean | SD    | mean            | SD    | mean             | SD   | mean             | SD   | mean              | SD   |
| <i>Achipteria coleoptrata</i>          | 0    | 0    | 0    | 0    | 0    | 0     | 118  | 289   | 0               | 0     | 0                | 0    | 0                | 0    | 0                 | 0    |
| <i>Belba</i> sp                        | 412  | 849  | 236  | 428  | 354  | 447   | 471  | 695   | 177             | 433   | 530              | 698  | 0                | 0    | 177               | 296  |
| <i>Brachychochthonius zelawaiensis</i> | 0    | 0    | 177  | 296  | 0    | 0     | 530  | 829   | 648             | 1010  | 118              | 289  | 0                | 0    | 884               | 1840 |
| <i>Camisia spinifer</i>                | 177  | 296  | 0    | 0    | 177  | 433   | 0    | 0     | 59              | 144   | 0                | 0    | 59               | 144  | 118               | 183  |
| <i>Carabodes forsslundi</i>            | 0    | 0    | 0    | 0    | 177  | 433   | 5008 | 12268 | 1120            | 2742  | 0                | 0    | 0                | 0    | 59                | 144  |
| <i>Eupelops acromios</i>               | 118  | 183  | 0    | 0    | 0    | 0     | 412  | 649   | 0               | 0     | 118              | 289  | 59               | 144  | 0                 | 0    |
| <i>Galumna lanceata</i>                | 884  | 1410 | 118  | 183  | 589  | 940   | 177  | 433   | 471             | 483   | 589              | 730  | 59               | 144  | 1591              | 2426 |
| <i>Galumna obvia</i>                   | 354  | 866  | 1120 | 1523 | 884  | 1479  | 648  | 756   | 2416            | 2867  | 1355             | 1808 | 707              | 671  | 295               | 348  |
| <i>Hemileius initialis</i>             | 59   | 144  | 0    | 0    | 0    | 0     | 0    | 0     | 59              | 144   | 0                | 0    | 0                | 0    | 0                 | 0    |
| <i>Heminothrus peltifer</i>            | 236  | 577  | 59   | 144  | 0    | 0     | 2062 | 5052  | 0               | 0     | 236              | 428  | 236              | 365  | 2357              | 4958 |
| <i>Latilamellobates incisellus</i>     | 0    | 0    | 0    | 0    | 59   | 144   | 59   | 144   | 0               | 0     | 0                | 0    | 0                | 0    | 0                 | 0    |
| <i>Liacarus coracinus</i>              | 177  | 433  | 118  | 183  | 295  | 470   | 59   | 144   | 118             | 183   | 0                | 0    | 0                | 0    | 118               | 183  |
| <i>Liochthonius</i> sp                 | 0    | 0    | 0    | 0    | 0    | 0     | 0    | 0     | 0               | 0     | 0                | 0    | 0                | 0    | 295               | 722  |
| <i>Malaconothrus monodactylus</i>      | 59   | 144  | 59   | 144  | 0    | 0     | 0    | 0     | 0               | 0     | 0                | 0    | 0                | 0    | 0                 | 0    |
| <i>Metabelba</i> sp                    | 0    | 0    | 0    | 0    | 118  | 289   | 0    | 0     | 0               | 0     | 59               | 144  | 236              | 577  | 0                 | 0    |
| <i>Microppia minus</i>                 | 1650 | 4041 | 4478 | 5931 | 707  | 1565  | 2475 | 2932  | 2357            | 3096  | 1178             | 2141 | 0                | 0    | 3830              | 3971 |
| <i>Moritzoppia uncarinata</i>          | 0    | 0    | 0    | 0    | 118  | 289   | 0    | 0     | 0               | 0     | 295              | 722  | 0                | 0    | 530               | 887  |
| <i>Nanhermannia comitalis</i>          | 0    | 0    | 0    | 0    | 0    | 0     | 0    | 0     | 0               | 0     | 0                | 0    | 0                | 0    | 118               | 289  |
| <i>Nanhermannia nanus</i>              | 59   | 144  | 0    | 0    | 0    | 0     | 0    | 0     | 0               | 0     | 0                | 0    | 0                | 0    | 0                 | 0    |
| <i>Nothrus anauniensis</i>             | 1473 | 1738 | 2652 | 3638 | 2887 | 2592  | 1414 | 2037  | 5421            | 11401 | 2887             | 4485 | 0                | 0    | 1061              | 1949 |
| <i>Nothrus silvestris</i>              | 0    | 0    | 118  | 289  | 0    | 0     | 707  | 806   | 589             | 1443  | 0                | 0    | 0                | 0    | 884               | 2165 |
| <i>Oppiella nova</i>                   | 0    | 0    | 118  | 289  | 177  | 433   | 0    | 0     | 0               | 0     | 295              | 722  | 295              | 566  | 0                 | 0    |
| <i>Oribatula tibialis</i>              | 59   | 144  | 0    | 0    | 0    | 0     | 0    | 0     | 0               | 0     | 0                | 0    | 0                | 0    | 0                 | 0    |
| <i>Paradamaeus clavipes</i>            | 59   | 144  | 0    | 0    | 0    | 0     | 0    | 0     | 0               | 0     | 0                | 0    | 0                | 0    | 0                 | 0    |
| <i>Peloptulus reticulatus</i>          | 0    | 0    | 0    | 0    | 0    | 0     | 118  | 289   | 0               | 0     | 0                | 0    | 236              | 577  | 0                 | 0    |
| <i>Phthiracarus laevigatus</i>         | 59   | 144  | 59   | 144  | 0    | 0     | 0    | 0     | 0               | 0     | 0                | 0    | 59               | 144  | 0                 | 0    |
| <i>Rhysotritia duplicata</i>           | 0    | 0    | 0    | 0    | 177  | 296   | 0    | 0     | 0               | 0     | 0                | 0    | 0                | 0    | 0                 | 0    |
| <i>Schelorbates laevigatus</i>         | 1002 | 1035 | 825  | 1443 | 1120 | 1059  | 1532 | 2415  | 3653            | 2526  | 3476             | 5032 | 2534             | 3552 | 3653              | 913  |
| <i>Scutovertex minutus</i>             | 59   | 144  | 0    | 0    | 648  | 1588  | 59   | 144   | 0               | 0     | 0                | 0    | 0                | 0    | 0                 | 0    |
| <i>Suctobelbella acutidens</i>         | 707  | 975  | 1178 | 2141 | 1414 | 1565  | 1061 | 1414  | 1886            | 2546  | 118              | 289  | 0                | 0    | 1061              | 1658 |
| <i>Suctobelbella alloenasuta</i>       | 648  | 566  | 884  | 1529 | 471  | 619   | 2062 | 2919  | 177             | 433   | 589              | 966  | 0                | 0    | 1532              | 1278 |
| <i>Suctobelbella sarekensis</i>        | 0    | 0    | 177  | 433  | 0    | 0     | 0    | 0     | 118             | 289   | 118              | 289  | 59               | 144  | 295               | 470  |
| <i>Suctobelbella subtrigona</i>        | 118  | 289  | 177  | 433  | 295  | 722   | 471  | 827   | 589             | 1133  | 0                | 0    | 0                | 0    | 589               | 913  |
| <i>Tectocepheus sarekensis</i>         | 0    | 0    | 1944 | 3254 | 236  | 577   | 1237 | 1512  | 412             | 1010  | 0                | 0    | 1237             | 1946 | 118               | 289  |
| <i>Tectocepheus velatus</i>            | 1650 | 3706 | 7542 | 8073 | 8308 | 10706 | 2298 | 1984  | 2062            | 3158  | 2652             | 2835 | 0                | 0    | 2946              | 4293 |
| Shannon index                          | 1.46 | 0.49 | 1.45 | 0.25 | 1.38 | 0.50  | 1.64 | 0.49  | 1.42            | 0.58  | 1.38             | 0.44 | 0.98             | 0.49 | 1.69              | 0.41 |
| Species richness                       | 6.50 | 2.74 | 6.67 | 1.63 | 7.33 | 2.73  | 8.50 | 2.66  | 6.83            | 3.71  | 6.00             | 2.83 | 3.50             | 1.64 | 8.50              | 2.59 |







Table S5a. Summary statistics of the Structural Equation Modelling of 2007 data. Exogenous factors are shown with capitals. Significant correlations are shown in **bold**.

| Parameter                                  | Estimate | Standard Error | Z-value | P(> z )      | Standardized regression coefficients |
|--------------------------------------------|----------|----------------|---------|--------------|--------------------------------------|
| <i>Soil water content during drought</i>   |          |                |         |              |                                      |
| DROUGHT                                    | -0.91    | 0.046          | -19.872 | <0.001       | <b>-0.944</b>                        |
| <i>Soil water content (mean annual)</i>    |          |                |         |              |                                      |
| WARMING                                    | -1.311   | 0.373          | -3.515  | <0.001       | <b>-0.419</b>                        |
| Soil water content during drought          | 1.221    | 0.39           | 3.132   | <b>0.002</b> | <b>0.376</b>                         |
| CO <sub>2</sub>                            | -0.179   | 0.375          | -0.476  | 0.634        | -0.057                               |
| <i>Soil temperature 5 cm (mean annual)</i> |          |                |         |              |                                      |
| WARMING                                    | 0.203    | 0.031          | 6.597   | <0.001       | <b>0.657</b>                         |
| CO <sub>2</sub>                            | 0.094    | 0.031          | 3.056   | <b>0.002</b> | <b>0.304</b>                         |
| <i>Litter C:N</i>                          |          |                |         |              |                                      |
| Soil water content during drought          | 0.01     | 0.376          | 0.026   | 0.979        | 0.004                                |
| Soil water content (mean annual)           | 0.183    | 0.115          | 1.595   | 0.111        | 0.224                                |
| Soil temperature 5 cm (mean annual)        | -1.81    | 1.143          | -1.583  | 0.113        | -0.218                               |
| CO <sub>2</sub>                            | 1.089    | 0.343          | 3.177   | <b>0.001</b> | <b>0.425</b>                         |
| <i>Fungi:bacteria ratio</i>                |          |                |         |              |                                      |
| Soil water content during drought          | 0.016    | 0.027          | 0.597   | 0.551        | 0.088                                |
| Soil water content (mean annual)           | -0.012   | 0.008          | -1.48   | 0.139        | -0.222                               |
| Soil temperature 5 cm (mean annual)        | 0.192    | 0.083          | 2.302   | <b>0.021</b> | <b>0.339</b>                         |
| CO <sub>2</sub>                            | -0.046   | 0.027          | -1.71   | 0.087        | -0.262                               |
| Litter C:N                                 | 0.017    | 0.01           | 1.619   | 0.105        | 0.244                                |
| <i>Microbial C:N</i>                       |          |                |         |              |                                      |
| Soil water content during drought          | -1.184   | 1.055          | -1.122  | 0.262        | -0.177                               |
| Soil water content (mean annual)           | 0.208    | 0.326          | 0.638   | 0.524        | 0.101                                |
| Soil temperature 5 cm (mean annual)        | 2.031    | 3.322          | 0.611   | 0.541        | 0.097                                |
| CO <sub>2</sub>                            | -0.573   | 0.972          | -0.59   | 0.555        | -0.089                               |
| Fungi:bacteria ratio                       | -6.414   | 5.538          | -1.158  | 0.247        | -0.173                               |
| <i>Collembola diversity (Shannon)</i>      |          |                |         |              |                                      |
| Soil water content during drought          | -0.13    | 0.122          | -1.066  | 0.287        | -0.161                               |
| Soil water content (mean annual)           | 0.007    | 0.038          | 0.17    | 0.865        | 0.026                                |
| Soil temperature 5 cm (mean annual)        | 0.56     | 0.402          | 1.392   | 0.164        | 0.222                                |
| CO <sub>2</sub>                            | -0.214   | 0.128          | -1.675  | 0.094        | -0.275                               |
| Litter C:N                                 | 0.109    | 0.051          | 2.143   | <b>0.032</b> | <b>0.358</b>                         |
| Fungi:bacteria ratio                       | -1.116   | 0.67           | -1.665  | 0.096        | -0.251                               |
| Microbial C:N                              | -0.018   | 0.018          | -1.003  | 0.316        | -0.147                               |

Table S5a continued

|                                                |          |                |        |                  |                |
|------------------------------------------------|----------|----------------|--------|------------------|----------------|
| <i>Oribatida diversity (Shannon)</i>           |          |                |        |                  |                |
| Soil water content during drought              | -0.004   | 0.137          | -0.03  | 0.976            | -0.004         |
| Soil water content (mean annual)               | 0.041    | 0.043          | 0.94   | 0.347            | 0.133          |
| Soil temperature 5 cm (mean annual)            | 0.299    | 0.452          | 0.662  | 0.508            | 0.096          |
| CO <sub>2</sub>                                | 0.048    | 0.144          | 0.334  | 0.739            | 0.05           |
| Litter C:N                                     | -0.204   | 0.057          | -3.571 | <b>&lt;0.001</b> | <b>-0.545</b>  |
| Fungi:bacteria ratio                           | 0.066    | 0.754          | 0.087  | 0.93             | 0.012          |
| Microbial C:N                                  | 0.018    | 0.02           | 0.929  | 0.353            | 0.124          |
|                                                |          |                |        |                  |                |
| <i>Nematode functional diversity (Shannon)</i> |          |                |        |                  |                |
| Soil water content during drought              | -0.012   | 0.057          | -0.208 | 0.835            | -0.027         |
| Soil water content (mean annual)               | -0.028   | 0.018          | -1.566 | 0.117            | -0.207         |
| Soil temperature 5 cm (mean annual)            | -0.058   | 0.189          | -0.308 | 0.758            | -0.043         |
| CO <sub>2</sub>                                | 0.022    | 0.06           | 0.361  | 0.718            | 0.051          |
| Litter C:N                                     | 0.075    | 0.023          | 3.209  | <b>0.001</b>     | <b>0.458</b>   |
| Fungi:bacteria ratio                           | -0.136   | 0.311          | -0.438 | 0.661            | -0.057         |
| Microbial C:N                                  | -0.025   | 0.008          | -3.057 | <b>0.002</b>     | <b>-0.388</b>  |
|                                                |          |                |        |                  |                |
| <b>Covariances</b>                             |          |                |        |                  |                |
| <i>Collembola diversity (Shannon)</i>          |          |                |        |                  |                |
| Oribatida diversity (Shannon)                  | 0.019    | 0.021          | 0.932  | 0.351            | 0.136          |
| Nematode functional diversity (Shannon)        | 0.016    | 0.009          | 1.769  | 0.077            | 0.27           |
|                                                |          |                |        |                  |                |
| <i>Oribatida diversity (Shannon)</i>           |          |                |        |                  |                |
| Nematode functional diversity (Shannon)        | 0.009    | 0.01           | 0.909  | 0.363            | 0.133          |
|                                                |          |                |        |                  |                |
| <b>Variances</b>                               |          |                |        |                  |                |
|                                                | Estimate | Standard Error |        |                  | R <sup>2</sup> |
| Soil water content during drought              | 0.025    | 0.005          |        |                  | 0.892          |
| Soil water content (mean annual)               | 1.666    | 0.34           |        |                  | 0.32           |
| Soil temperature 5 cm (mean annual)            | 0.011    | 0.002          |        |                  | 0.524          |
| Litter C:N                                     | 1.248    | 0.255          |        |                  | 0.24           |
| Fungi:bacteria ratio                           | 0.006    | 0.001          |        |                  | 0.174          |
| Microbial C:N                                  | 9.777    | 1.996          |        |                  | 0.063          |
| Collembola diversity (Shannon)                 | 0.134    | 0.027          |        |                  | 0.161          |
| Oribatida diversity (Shannon)                  | 0.161    | 0.033          |        |                  | 0.301          |
| Nematode functional diversity (Shannon)        | 0.026    | 0.005          |        |                  | 0.389          |
|                                                |          |                |        |                  |                |

Table S5b. Summary statistics of the Structural Equation Modelling of 2013 data. Exogenous factors are shown with capitals. Significant correlations are shown in **bold**.

| Parameter                                  | Estimate | Standard Error | Z-value | P(> z )          | Standardized regression coefficients |
|--------------------------------------------|----------|----------------|---------|------------------|--------------------------------------|
| <i>Soil water content during drought</i>   |          |                |         |                  |                                      |
| DROUGHT                                    | -0.611   | 0.068          | -9.049  | <b>&lt;0.001</b> | <b>-0.794</b>                        |
| <i>Soil water content (mean annual)</i>    |          |                |         |                  |                                      |
| WARMING                                    | -0.964   | 0.474          | -2.035  | <b>0.042</b>     | <b>-0.233</b>                        |
| Soil water content during drought          | 3.023    | 0.616          | 4.91    | <b>&lt;0.001</b> | <b>0.562</b>                         |
| CO <sub>2</sub>                            | -0.124   | 0.474          | -0.262  | 0.793            | -0.03                                |
| <i>Soil temperature 5 cm (mean annual)</i> |          |                |         |                  |                                      |
| WARMING                                    | 0.067    | 0.038          | 1.747   | 0.081            | 0.236                                |
| CO <sub>2</sub>                            | 0.076    | 0.038          | 1.978   | <b>0.048</b>     | <b>0.267</b>                         |
| <i>Litter C:N</i>                          |          |                |         |                  |                                      |
| Soil water content during drought          | 0.095    | 0.132          | 0.72    | 0.472            | 0.115                                |
| Soil water content (mean annual)           | -0.026   | 0.024          | -1.078  | 0.281            | -0.171                               |
| Soil temperature 5 cm (mean annual)        | -0.16    | 0.313          | -0.51   | 0.61             | -0.071                               |
| CO <sub>2</sub>                            | 0.264    | 0.087          | 3.054   | <b>0.002</b>     | <b>0.415</b>                         |
| <i>Fungi:bacteria ratio</i>                |          |                |         |                  |                                      |
| Soil water content during drought          | 0.017    | 0.086          | 0.2     | 0.841            | 0.034                                |
| Soil water content (mean annual)           | -0.013   | 0.016          | -0.79   | 0.43             | -0.136                               |
| Soil temperature 5 cm (mean annual)        | 0.035    | 0.204          | 0.173   | 0.862            | 0.026                                |
| CO <sub>2</sub>                            | -0.046   | 0.061          | -0.742  | 0.458            | -0.118                               |
| Litter C:N                                 | 0.133    | 0.094          | 1.425   | 0.154            | 0.221                                |
| <i>Microbial C:N</i>                       |          |                |         |                  |                                      |
| Soil water content during drought          | 0.697    | 0.798          | 0.874   | 0.382            | 0.151                                |
| Soil water content (mean annual)           | -0.063   | 0.149          | -0.422  | 0.673            | -0.073                               |
| Soil temperature 5 cm (mean annual)        | 1.138    | 1.906          | 0.597   | 0.55             | 0.091                                |
| CO <sub>2</sub>                            | 0.044    | 0.524          | 0.084   | 0.933            | 0.012                                |
| Fungi:bacteria ratio                       | 1.375    | 1.317          | 1.044   | 0.297            | 0.149                                |
| <i>Enchytraeidae diversity (Shannon)</i>   |          |                |         |                  |                                      |
| Soil water content during drought          | -0.111   | 0.068          | -1.641  | 0.101            | -0.277                               |
| Soil water content (mean annual)           | 0.021    | 0.013          | 1.636   | 0.102            | 0.276                                |
| Soil temperature 5 cm (mean annual)        | 0.106    | 0.16           | 0.663   | 0.507            | 0.097                                |
| CO <sub>2</sub>                            | 0.003    | 0.048          | 0.069   | 0.945            | 0.011                                |
| Litter C:N                                 | -0.014   | 0.075          | -0.184  | 0.854            | -0.028                               |
| Fungi:bacteria ratio                       | 0.028    | 0.114          | 0.247   | 0.805            | 0.035                                |
| Microbial C:N                              | -0.016   | 0.012          | -1.289  | 0.197            | -0.181                               |
| <i>Collembola diversity (Shannon)</i>      |          |                |         |                  |                                      |
| Soil water content during drought          | -0.211   | 0.156          | -1.352  | 0.176            | -0.222                               |
| Soil water content (mean annual)           | 0.079    | 0.029          | 2.718   | <b>0.007</b>     | <b>0.446</b>                         |
| Soil temperature 5 cm (mean annual)        | -0.106   | 0.368          | -0.287  | 0.774            | -0.041                               |
| CO <sub>2</sub>                            | 0.053    | 0.111          | 0.479   | 0.632            | 0.073                                |
| Litter C:N                                 | -0.146   | 0.172          | -0.845  | 0.398            | -0.126                               |
| Fungi:bacteria ratio                       | 0.123    | 0.263          | 0.468   | 0.64             | 0.065                                |
| Microbial C:N                              | 0.017    | 0.028          | 0.593   | 0.553            | 0.081                                |

Table S5b continued

|                                                |          |                |        |              |                |
|------------------------------------------------|----------|----------------|--------|--------------|----------------|
| <i>Oribatida diversity (Shannon)</i>           |          |                |        |              |                |
| Soil water content during drought              | -0.022   | 0.201          | -0.111 | 0.912        | -0.023         |
| Soil water content (mean annual)               | 0.03     | 0.036          | 0.847  | 0.397        | 0.167          |
| Soil temperature 5 cm (mean annual)            | -0.145   | 0.536          | -0.27  | 0.787        | -0.055         |
| CO <sub>2</sub>                                | -0.311   | 0.16           | -1.949 | 0.051        | -0.418         |
| Litter C:N                                     | 0.524    | 0.31           | 1.691  | 0.091        | 0.448          |
| Fungi:bacteria ratio                           | 0.277    | 0.381          | 0.727  | 0.467        | 0.143          |
| Microbial C:N                                  | 0.025    | 0.06           | 0.414  | 0.679        | 0.119          |
|                                                |          |                |        |              |                |
| <i>Nematode functional diversity (Shannon)</i> |          |                |        |              |                |
| Soil water content during drought              | 0.067    | 0.056          | 1.198  | 0.231        | 0.187          |
| Soil water content (mean annual)               | -0.018   | 0.01           | -1.705 | 0.088        | -0.266         |
| Soil temperature 5 cm (mean annual)            | -0.166   | 0.132          | -1.258 | 0.208        | -0.17          |
| CO <sub>2</sub>                                | 0.108    | 0.04           | 2.699  | <b>0.007</b> | <b>0.389</b>   |
| Litter C:N                                     | -0.036   | 0.062          | -0.585 | 0.559        | -0.083         |
| Fungi:bacteria ratio                           | 0.075    | 0.094          | 0.797  | 0.425        | 0.105          |
| Microbial C:N                                  | 0.017    | 0.01           | 1.634  | 0.102        | 0.213          |
|                                                |          |                |        |              |                |
| <b>Covariances</b>                             |          |                |        |              |                |
| <i>Enchytraeidae diversity (Shannon)</i>       |          |                |        |              |                |
| Collembola diversity (Shannon)                 | -0.006   | 0.007          | -0.798 | 0.425        | -0.116         |
| Oribatida diversity (Shannon)                  | 0.008    | 0.01           | 0.822  | 0.411        | 0.174          |
| Nematode functional diversity (Shannon)        | 0.002    | 0.003          | 0.832  | 0.405        | 0.121          |
|                                                |          |                |        |              |                |
| <i>Collembola diversity (Shannon)</i>          |          |                |        |              |                |
| Oribatida diversity (Shannon)                  | 0.018    | 0.029          | 0.642  | 0.521        | 0.176          |
| Nematode functional diversity (Shannon)        | 0.001    | 0.006          | 0.098  | 0.922        | 0.014          |
|                                                |          |                |        |              |                |
| <i>Oribatida diversity (Shannon)</i>           |          |                |        |              |                |
| Nematode functional diversity (Shannon)        | -0.003   | 0.01           | -0.333 | 0.739        | -0.09          |
|                                                |          |                |        |              |                |
| <b>Variances</b>                               |          |                |        |              |                |
|                                                | Estimate | Standard Error |        |              | R <sup>2</sup> |
| Soil water content during drought              | 0.055    | 0.011          |        |              | 0.63           |
| Soil water content (mean annual)               | 2.694    | 0.55           |        |              | 0.371          |
| Soil temperature 5 cm (mean annual)            | 0.018    | 0.004          |        |              | 0.127          |
| Litter C:N                                     | 0.083    | 0.017          |        |              | 0.185          |
| Fungi:bacteria ratio                           | 0.035    | 0.007          |        |              | 0.062          |
| Microbial C:N                                  | 3.003    | 0.62           |        |              | 0.049          |
| Enchytraeidae diversity (Shannon)              | 0.021    | 0.004          |        |              | 0.114          |
| Collembola diversity (Shannon)                 | 0.113    | 0.023          |        |              | 0.161          |
| Oribatida diversity (Shannon)                  | 0.096    | 0.028          |        |              | 0.309          |
| Nematode functional diversity (Shannon)        | 0.015    | 0.003          |        |              | 0.243          |
|                                                |          |                |        |              |                |

Table S6. Mean soil temperature during 12 months prior sampling (Ts5; 5 cm depth), mean soil water content during 12 months prior sampling (SWC; 0-20 cm depth) and minimum SWC during drought (0-20 cm depth) in ambient (A; control), warmed (T), drought (D) and CO<sub>2</sub> treated plots (CO<sub>2</sub>) at the CLIMAITE field site.

|                                                                                                               | A     |      | T     |      | D     |      | TD    |      | CO <sub>2</sub> |      | TCO <sub>2</sub> |      | DCO <sub>2</sub> |      | TDCO <sub>2</sub> |      |
|---------------------------------------------------------------------------------------------------------------|-------|------|-------|------|-------|------|-------|------|-----------------|------|------------------|------|------------------|------|-------------------|------|
|                                                                                                               | mean  | SD   | mean  | SD   | mean  | SD   | mean  | SD   | mean            | SD   | mean             | SD   | mean             | SD   | mean              | SD   |
| <b>2007</b>                                                                                                   |       |      |       |      |       |      |       |      |                 |      |                  |      |                  |      |                   |      |
| mean Ts5 12 months prior sampling (°C)                                                                        | 10.29 | 0.12 | 10.55 | 0.12 | 10.27 | 0.06 | 10.42 | 0.13 | 10.37           | 0.12 | 10.59            | 0.10 | 10.38            | 0.12 | 10.56             | 0.11 |
| mean SWC 12 months prior sampling (vol%)                                                                      | 17.74 | 0.68 | 16.00 | 1.84 | 15.58 | 0.97 | 14.88 | 2.05 | 16.18           | 1.42 | 15.61            | 1.11 | 16.79            | 1.30 | 14.36             | 0.76 |
| Minimum SWC during drought (vol%)*                                                                            | 16.51 | 0.66 | 14.75 | 1.90 | 5.51  | 0.62 | 6.18  | 2.91 | 13.89           | 2.13 | 13.73            | 1.11 | 5.28             | 0.68 | 4.70              | 0.78 |
| <b>2013</b>                                                                                                   |       |      |       |      |       |      |       |      |                 |      |                  |      |                  |      |                   |      |
| mean Ts5 12 months prior sampling (°C)                                                                        | 8.05  | 0.18 | 8.17  | 0.14 | 8.02  | 0.12 | 8.07  | 0.16 | 8.12            | 0.10 | 8.20             | 0.14 | 8.14             | 0.14 | 8.17              | 0.13 |
| mean SWC 12 months prior sampling (vol%)                                                                      | 17.11 | 0.47 | 14.98 | 2.33 | 15.28 | 0.77 | 14.35 | 3.43 | 14.78           | 1.87 | 15.79            | 1.57 | 16.25            | 1.57 | 14.21             | 2.60 |
| Minimum SWC during drought (vol%)**                                                                           | 16.28 | 1.66 | 13.78 | 3.69 | 7.26  | 0.99 | 8.17  | 1.62 | 13.72           | 3.40 | 16.08            | 1.86 | 8.14             | 1.24 | 7.60              | 4.89 |
| * the mean SWC during the last week (June 15-22, 2007) of the latest drought period (May 21 to June 22, 2007) |       |      |       |      |       |      |       |      |                 |      |                  |      |                  |      |                   |      |
| ** the mean SWC during the last week (4-11 June 2012) of the latest drought period (8 May to 11 June)         |       |      |       |      |       |      |       |      |                 |      |                  |      |                  |      |                   |      |

Table S7. Mean litter C:N, Fungi:bacteria ratio and microbial C:N in ambient (A; control), warmed (T), drought (D) and CO<sub>2</sub> treated plots (CO2) at the CLIMAITE field site. Litter C:N (2013) and microbial C:N (2013) are from Vestergård et al. (2015).

|                      | A     |      | T     |       | D     |      | TD    |      | CO2   |       | TCO2  |       | DCO2  |       | TDCO2 |      |
|----------------------|-------|------|-------|-------|-------|------|-------|------|-------|-------|-------|-------|-------|-------|-------|------|
|                      | mean  | SD   | mean  | SD    | mean  | SD   | mean  | SD   | mean  | SD    | mean  | SD    | mean  | SD    | mean  | SD   |
| 2007                 |       |      |       |       |       |      |       |      |       |       |       |       |       |       |       |      |
| Litter C:N ratio     | 41.62 | 6.08 | 40.38 | 10.17 | 38.95 | 3.35 | 38.00 | 5.47 | 49.26 | 11.15 | 45.57 | 13.20 | 61.13 | 21.69 | 37.38 | 7.79 |
| Fungi:bacteria ratio | 0.10  | 0.09 | 0.19  | 0.09  | 0.14  | 0.09 | 0.23  | 0.12 | 0.12  | 0.11  | 0.24  | 0.07  | 0.17  | 0.12  | 0.09  | 0.07 |
| Microbial C:N ratio  | 9.62  | 2.93 | 8.87  | 2.15  | 8.99  | 2.70 | 10.00 | 3.17 | 9.65  | 5.39  | 7.29  | 3.23  | 10.16 | 3.88  | 9.41  | 2.79 |
| 2013                 |       |      |       |       |       |      |       |      |       |       |       |       |       |       |       |      |
| Litter C:N ratio     | 26.75 | 3.66 | 26.90 | 3.94  | 27.92 | 2.53 | 28.43 | 2.59 | 31.74 | 3.11  | 29.37 | 2.16  | 29.37 | 2.37  | 29.73 | 3.60 |
| Fungi:bacteria ratio | 0.66  | 0.13 | 0.65  | 0.21  | 0.67  | 0.25 | 0.60  | 0.11 | 0.75  | 0.13  | 0.54  | 0.14  | 0.67  | 0.34  | 0.60  | 0.18 |
| Microbial C:N ratio  | 8.57  | 0.58 | 9.82  | 1.45  | 9.92  | 1.77 | 9.70  | 0.96 | 10.80 | 3.45  | 9.70  | 1.97  | 8.65  | 1.00  | 9.13  | 1.55 |

Figure S1. Additional degree days (i.e. accumulated hourly residuals) in elevated temperature plots compared to non-elevated temperature plots ( $N = 24$ ) during the period 2006-2013. Graphs are zeroed 1<sup>st</sup> of January each year. Grey areas represent 1 standard error.

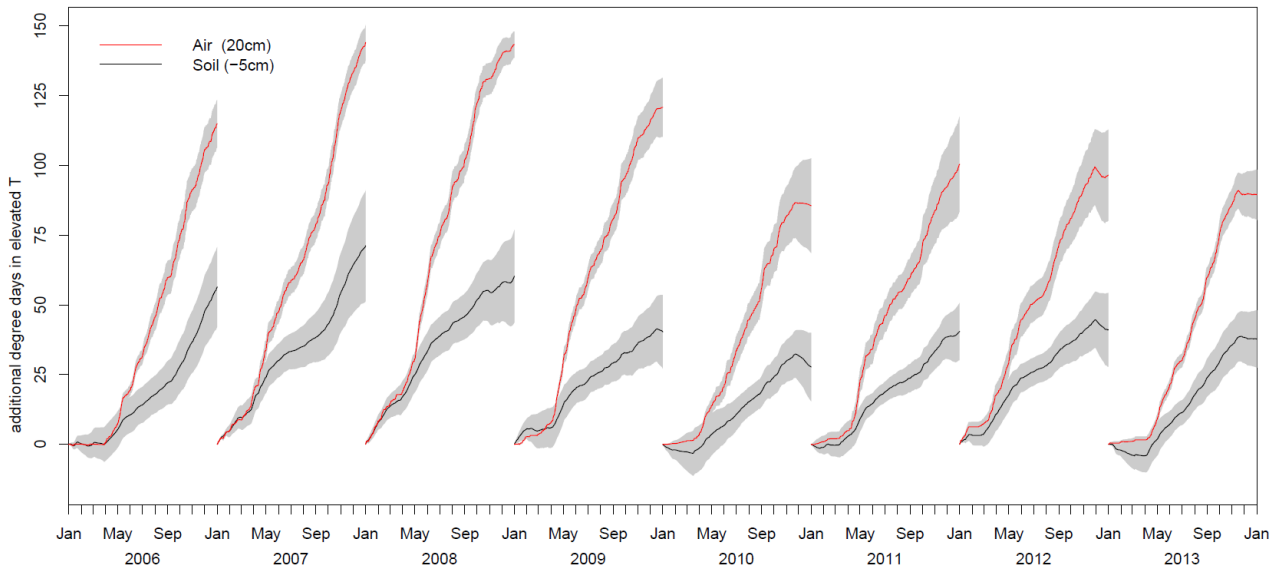

## References

- Holmstrup, M., Schmelz, R.M., Carrera, N., Dyrnum, K., Larsen, K.S., Mikkelsen, T.N., Beier, C., 2015. Responses of enchytraeids to increased temperature, drought and atmospheric CO<sub>2</sub>: Results of an eight-year field experiment in dry heathland. *European Journal of Soil Biology* 70, 15-22.
- Vestergård, M., Dyrnum, K., Michelsen, A., Damgaard, C., Holmstrup, M., 2015. Long-term multifactorial climate change impacts on mesofaunal biomass and nitrogen content. *Applied Soil Ecology* 92, 54-63.
